# Supplementary material
Source: MDPI journal article supplement (https://www.mdpi.com/2079-6412/12/8/1060)
Supplement: s1 [file s1]

Article

# Supporting information: Microwave facile synthesis of NiO<sub>x</sub>@graphene nanocomposites for application in supercapacitors: Insights to the formation and storage mechanism

Yue Liang <sup>1</sup>, Zhen Wei <sup>2</sup>, Ruigang Wang <sup>2,\*</sup> and Xinyu Zhang <sup>1,\*</sup>

<sup>1</sup> Department of Chemical Engineering, Auburn University, Auburn, AL 36849, USA; yzl0242@auburn.edu

<sup>2</sup> Department of Metallurgical and Materials Engineering, The University of Alabama, Tuscaloosa, AL 35487, USA; zwei17@crimson.ua.edu

\* Correspondence: rwang@eng.ua.edu (R.W.); xzz0004@auburn.edu (X.Z.)

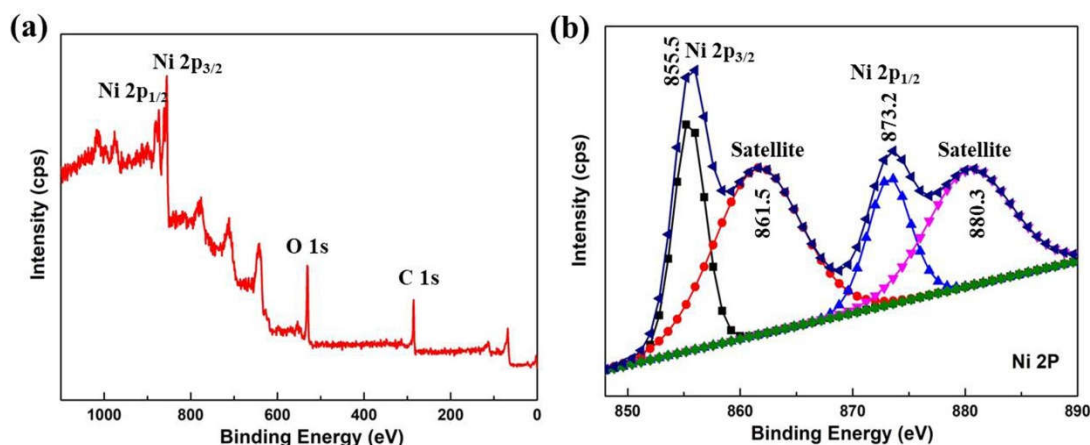

**Figure S1.** (a) XPS spectrum of the NiO<sub>x</sub>@GR-C2; (b) High-resolution XPS spectrum of Ni 2p.

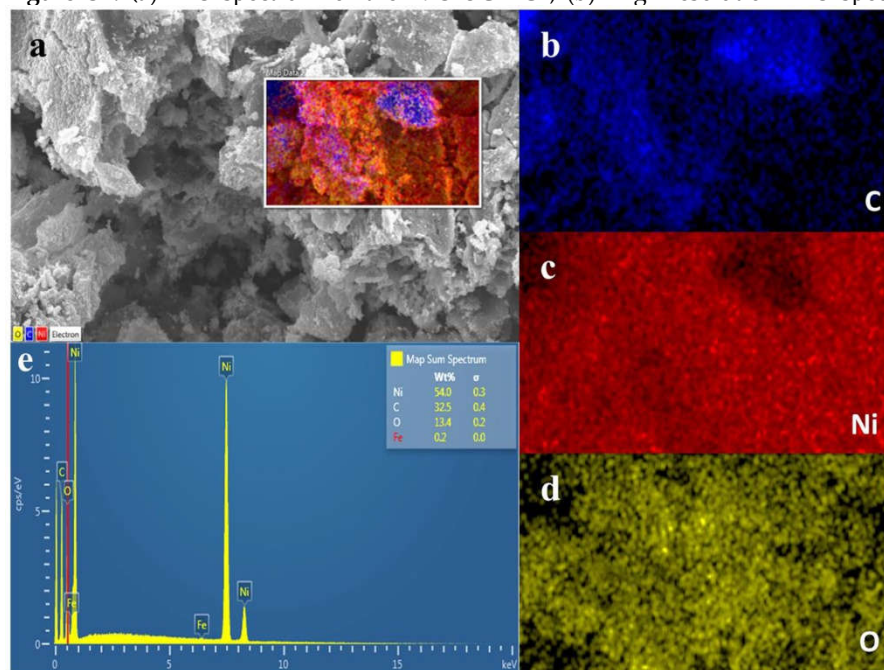

**Figure S2.** (a) SEM image of NiO<sub>x</sub>@GR-C2 (inset: EDS composite elemental map); elemental mapping: (b) C, (c) Ni, (d) O; (e) EDS spectrum.

**Table S1.** Operation conditions for synthesizing NiO<sub>x</sub>@graphene.

| Sample                  | <i>G</i> <sup>a</sup> (mg) | Ni(OH) <sub>2</sub> (mg) | NiO <sub>x</sub> <sup>b</sup> (mg) | Microwave power (W) | Heating time (min) |
|-------------------------|----------------------------|--------------------------|------------------------------------|---------------------|--------------------|
| NiO <sub>x</sub> @GR-A1 | 25                         | 61.8                     | 49.8                               | 1250                | 5                  |
| NiO <sub>x</sub> @GR-A2 | 25                         | 46.4                     | 37.4                               | 1250                | 5                  |
| NiO <sub>x</sub> @GR-A3 | 25                         | 30.9                     | 24.9                               | 1250                | 5                  |

<sup>a</sup>Mass of graphene.<sup>b</sup>Mass of NiO<sub>x</sub> calculated according to the nickel precursor.**Table S2.** Operation conditions for synthesizing NiO<sub>x</sub>@graphene.

| Sample                  | <i>G</i> <sup>a</sup> (mg) | Ni(Ac) <sub>2</sub> ·4H <sub>2</sub> O (mg) | NiO <sub>x</sub> <sup>b</sup> (mg) | Microwave power (W) | Heating time (min) |
|-------------------------|----------------------------|---------------------------------------------|------------------------------------|---------------------|--------------------|
| NiO <sub>x</sub> @GR-B1 | 25                         | 165.8                                       | 49.8                               | 1250                | 5                  |
| NiO <sub>x</sub> @GR-B2 | 25                         | 124.4                                       | 37.4                               | 1250                | 5                  |
| NiO <sub>x</sub> @GR-B3 | 25                         | 82.9                                        | 24.9                               | 1250                | 5                  |

<sup>a</sup>Mass of graphene.<sup>b</sup>Mass of NiO<sub>x</sub> calculated according to the nickel precursor.**Table S3.** Operation conditions for synthesizing NiO<sub>x</sub>@graphene.

| Sample                  | <i>G</i> <sup>a</sup> (mg) | Ni(NO <sub>3</sub> ) <sub>2</sub> ·6H <sub>2</sub> O (mg) | NiO <sub>x</sub> <sup>b</sup> (mg) | Microwave power (W) | Heating time (min) |
|-------------------------|----------------------------|-----------------------------------------------------------|------------------------------------|---------------------|--------------------|
| NiO <sub>x</sub> @GR-C1 | 25                         | 193.9                                                     | 49.8                               | 1250                | 5                  |
| NiO <sub>x</sub> @GR-C2 | 25                         | 145.4                                                     | 37.4                               | 1250                | 5                  |
| NiO <sub>x</sub> @GR-C3 | 25                         | 96.9                                                      | 24.9                               | 1250                | 5                  |

<sup>a</sup>Mass of graphene.<sup>b</sup>Mass of NiO<sub>x</sub> calculated according to the nickel precursor.
